# Supplementary material for: Aberrant activity of mitochondrial NCLX is linked to impaired synaptic transmission and is associated with mental retardation
Source: PubMed Central journal article supplement (PMC8172942; doi:10.1038/s42003-021-02114-0), 2021-06-02
Supplement: 42003_2021_2114_MOESM3_ESM.pdf [file 42003_2021_2114_MOESM3_ESM.pdf]

## **Description of Additional Supplementary Files**

File Name: Supplementary Data 1

Description: Source data for the graphs and charts is available as a Supplementary Data excel file
